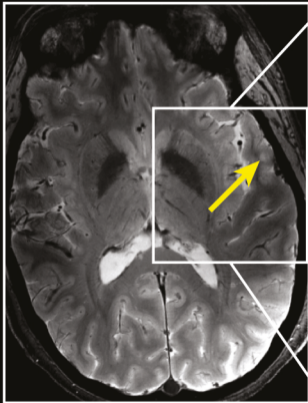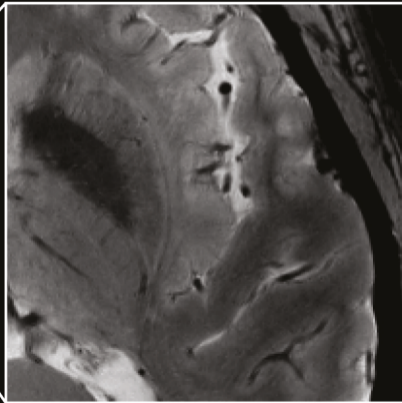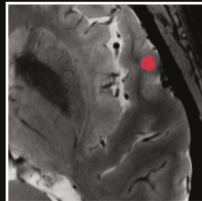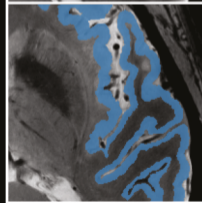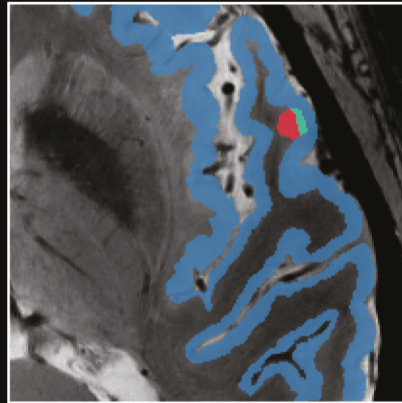

Source: https://oup.silverchair-cdn.com/oup/backfile/Content_public/Journal/brain/140/11/10.1093_brain_awx247/4/brain-2016-02069-file007_awx247.pdf
